# Supplementary material for: High voltage electrolytes for lithium-ion batteries with micro-sized silicon anodes
Source: PubMed Central journal article supplement (PMC10853533; doi:10.1038/s41467-024-45374-0), 2024-02-08
Supplement: 41467_2024_45374_MOESM3_ESM.pdf [file 41467_2024_45374_MOESM3_ESM.pdf]

## **Description of Additional Supplementary Files**

**Supplementary Movie 1:** Flammable test video for the EE electrolytes

**Supplementary Movie 2:** Flammable test video for the FFT electrolytes

**Supplementary Movie 3:** Flammable test video for the FST electrolytes
